# Supplementary material
Source: HighWire-hosted journal article supplement (https://www.jpn.ca/highwire/filestream/89604/field_highwire_adjunct_files/0/jpn-150058-1-at.pdf)
Supplement: jpn-150058-1-at.pdf [file jpn-150058-1-at.pdf]

**Appendix 1** to McDermott TJ, Badura-Brack AS, Becker KM, et al. Male veterans with PTSD exhibit aberrant neural dynamics during working memory processing: a MEG study. *J Psychiatry Neurosci* 2015.

DOI: 10.1503/jpn.150058

Copyright © 2015 The Author(s) or their employer(s). To receive this resource in an accessible format, please contact us at [cmajgroup@cmaj.ca](mailto:cmajgroup@cmaj.ca).

*Online appendices are unedited and posted as supplied by the authors.*

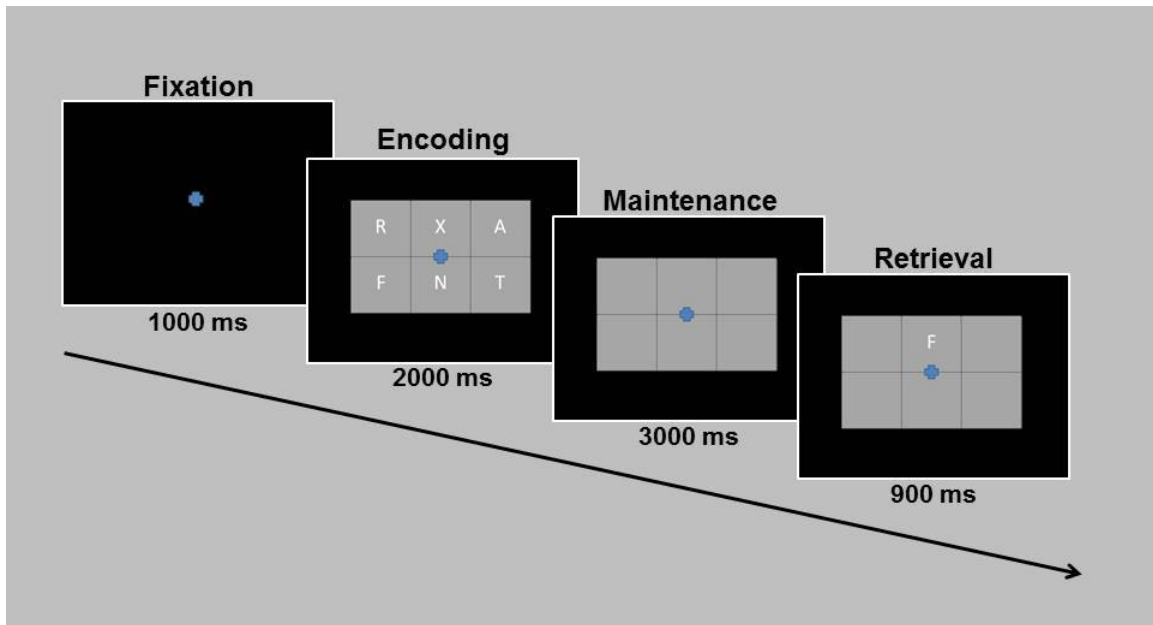

**Supplemental Figure.** Layout of Working Memory Paradigm. Each trial consisted of four phases: (1) a Fixation phase lasting 1000 ms that included the baseline (-400 to 0 ms), (2) an Encoding phase lasting 2000 s and consisting of 6 letters presented simultaneously within a grid, (3) a Maintenance phase lasting 3000 ms during which the six letters disappeared from the grid, and (4) a Retrieval phase lasting 900 ms that required participants to identify whether the probe letter appeared in the original Encoding set. Each participant completed 128 trials during each MEG session.
